# Supplementary material
Source: Springer Nature journal article supplement (https://www.springermedizin.de/resource/supplementary/12906_2014_1904_MOESM8_ESM.docx/9523144)
Supplement: MOESM8 [file 9523144]

**Table 1**

| Concentration of extract (µg/mL) | % Inhibition of adult male worm motility | | % Inhibition of formazan formation by female worm | | % inhibition of mfs motility | |
| --- | --- | --- | --- | --- | --- | --- |
| **CL**  **LMeOH** | **ML**  **LMeOH** | **CL**  **LMeOH** | **ML**  **LMeOH** | **CL**  **LMeOH** | **ML**  **LMeOH** |
| 500 | 100 | 100 | 100 | 100 | 100 | 100 |
| 250 | 50 | 100 | 50 | 100 | 100 | 100 |
| 125 | 50 | 50 | 50 | 50 | 100 | 100 |
| 62.5 | 0 | 0 | 0 | 0 | 25 | 50 |
| 31.25 | 0 | 0 | 0 | 0 | 0 | 25 |
| 15.63 | 0 | 0 | 0 | 0 | 0 | 0 |
| 0 | 0 | 0 | 0 | 0 | 0 | 0 |
| Positive control | 100 | 100 | 100 | 100 | 100 | 100 |
| Negative control | 0 | 0 | 0 | 0 | 0 | 0 |

(CLLMeOH: methanolic extract of *C. laurinum* and MLLMeOH: methanolic extract of *M. lucida*).
